# Supplementary material for: High-performance flexible thermoelectric devices with a copper foam heatsink for personal thermal management
Source: Royal Society of Chemistry journal article supplement (doi:10.1039/d4tc01006j), 2024-01-01
Supplement: d4tc01006j1.pdf [file d4tc01006j1.pdf]

## Supporting Information

### High-Performance Flexible Thermoelectric Devices with Foam Copper Heatsink for Personal Thermal Management

Wenjie Zhou,<sup>ab</sup> Kaikai Pang,<sup>a</sup> Yuyou Zhang,<sup>a</sup> Chuandong Zhou,<sup>a</sup> Zongwei Zhang,<sup>a</sup>  
Hao Yang,<sup>a</sup> Qiang Zhang,<sup>a</sup> Yanan Li,<sup>a</sup> Haoyang Hu,<sup>\*a</sup> Xiaojian Tan,<sup>\*a</sup> Peng Sun,<sup>a</sup>  
Jiehua Wu,<sup>a</sup> Guoqiang Liu,<sup>a</sup> Jun Jiang<sup>\*a</sup>

<sup>a</sup> *Ningbo Institute of Materials Technology and Engineering, Chinese Academy of  
Sciences, Ningbo 315201, China*

<sup>b</sup> *Faculty of Mechanical Engineering and Mechanics, Ningbo University, Ningbo  
315211, China*

#### Corresponding Author

\*E-mail: huhaoyang@nimte.ac.cn, tanxiaojian@nimte.ac.cn, jjun@nimte.ac.cn

## Synthesis of materials

The sample synthesis of p-type  $\text{Bi}_{0.4}\text{Sb}_{1.6}\text{Te}_3$ : high purity (<99.999%) Bi, Sb, Se and Te blocks, and synthesized AgGeTe are weighed according to the stoichiometric ratio of  $\text{Bi}_{0.4}\text{Sb}_{1.6}\text{Te}_{2.95}\text{Se}_{0.05} + 0.10 \text{ wt}\% \text{ Ag}_8\text{GeTe}_6$ . The raw materials are loaded into quartz tubes and sealed with an oxyacetylene flame under a vacuum of 5 Pa. The mixture is then melted at 750°C for 1.0 h, oscillated for half an hour, and air quenched. Finally, the obtained material is ground into fine powder through high-speed ball-milled that is loaded in a  $\Phi 40$  mm graphite mold and densified by discharge plasma sintering at 703 K and 50 MPa for 8 min.<sup>(1)</sup>

Similarly, for n-materials, Bi, Te, and Se blocks (5 N),  $\text{BiI}_3$  powders (4 N) and the prepared  $\text{SnSb}_2\text{Te}_4$  powders were weighed according to the stoichiometric ratio of  $\text{Bi}_2\text{Te}_{2.7}\text{Se}_{0.3} + 0.15 \text{ wt}\% \text{ BiI}_3 + 0.15 \text{ wt}\% \text{ SnSb}_2\text{Te}_4$ . The mixtures were sealed in a  $\Phi 12.7$  mm quartz tube at a high vacuum and melted in a rocking furnace at 1023 K for 1 h, followed by air quenching. Subsequently, the obtained ingots were zone-melting at 1013 K with a growth rate of 25 mm h<sup>-1</sup> in a vertical growth furnace.<sup>(2)</sup>

## Error analysis of material's transport coefficients

The electronic and thermal transport measurements for the materials were conducted along the same direction of the same ingot. The systematic errors of Seebeck coefficient  $\alpha$  and electrical conductivity  $\sigma$  measurements were about 3% and 5%, respectively. Based on the uncertainties of 1% for the density  $\rho$ , 5% for the specific heat  $C_p$ , and 5% for the thermal diffusion  $D$ , the combined uncertainty for the total thermal conductivity  $\kappa_{\text{tot}}$  is about 7%. Ultimately, the uncertainty in the  $ZT$  value is estimated to be about 10%.

## Test method for cooling temperature difference

The cooling performance of the device was evaluated according to Fig. S4, the DC power supply inputs distinct currents for F-TED, and the cooling system kept the hot side ( $T_h$ ) at a stable temperature of 27 °C. The temperature of the cold side ( $T_c$ ) was monitored by an infrared thermal imaging device (Fluke, Ti400, USA). The maximum

cooling temperature difference of the F-TED was calculated by following formulae,

$$\Delta T_{\max} = T_h - T_c.$$

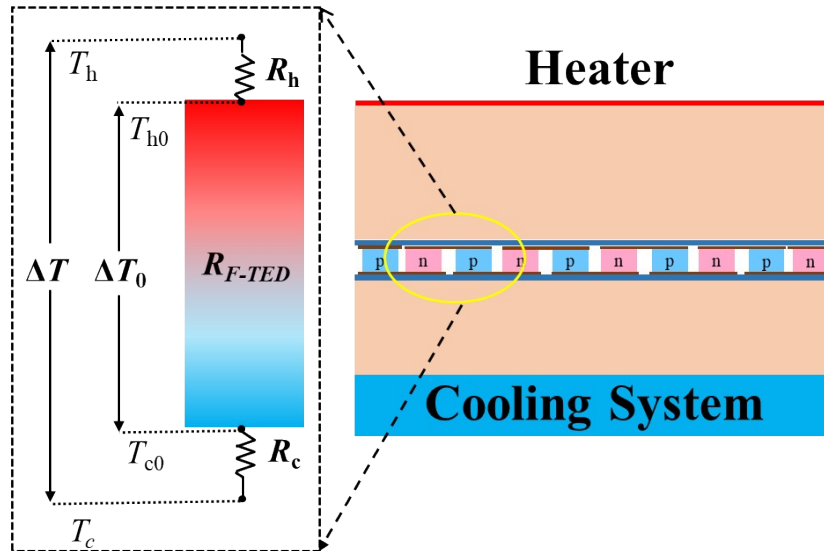

**Figure S1.** Schematic diagram of thermal resistance network in thermoelectric device testing

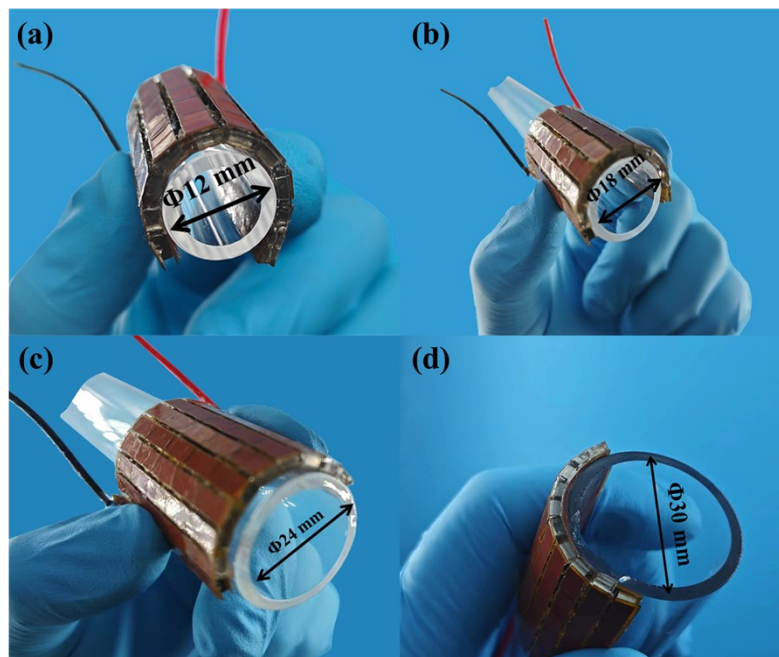

**Figure S2.** Schematic diagram of bending of flexible devices at different diameters.

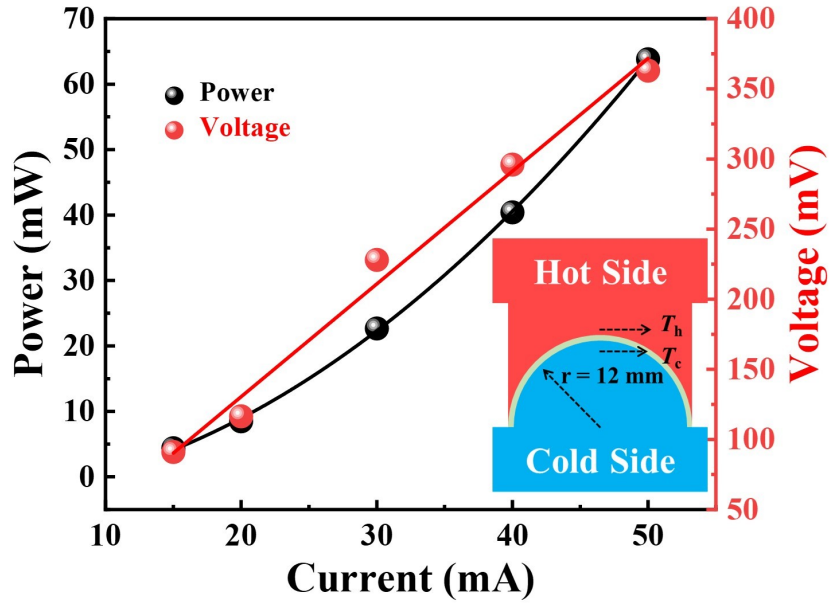

Figure S3. Schematic diagram of F-TED's power generation performance and testing system under bending conditions

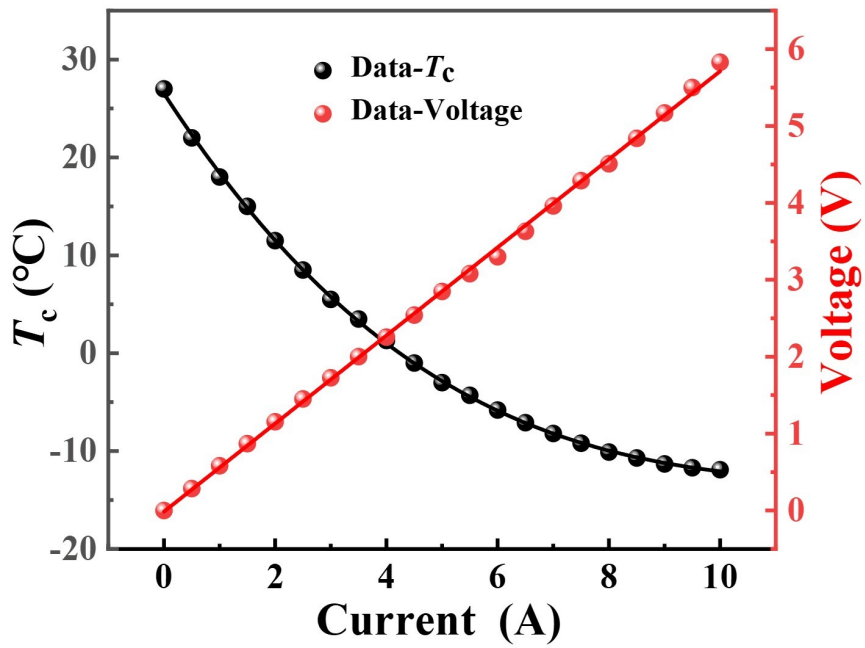

Figure S4. The relationship between cooling temperature difference and input voltage and input current of devices in a bent state

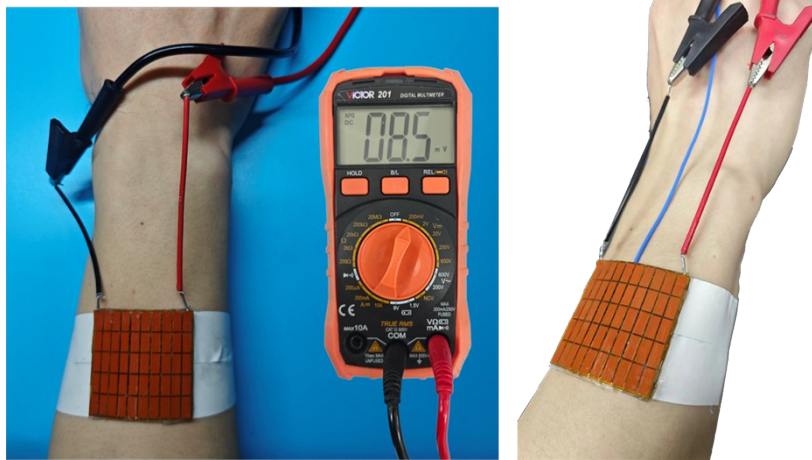

Figure S5. Experimental diagram of flexible components without foam copper heatsink in PTM

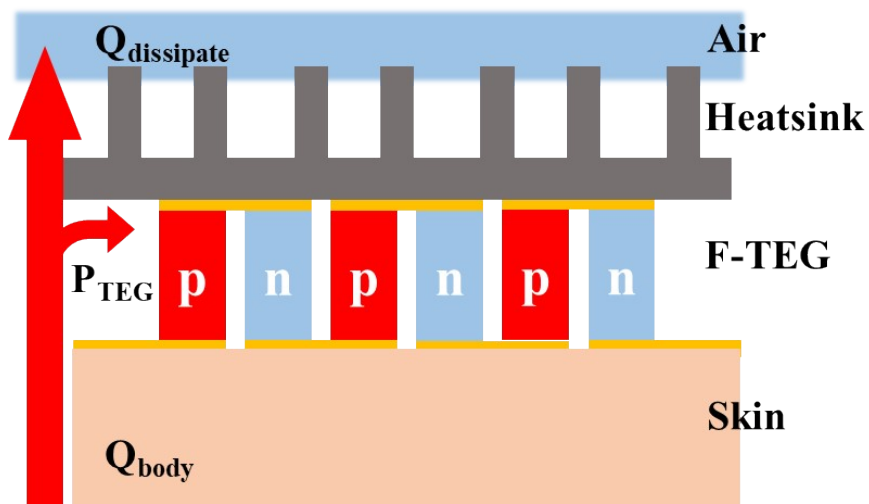

Figure S6. Schematic diagram of human body waste heat power generation

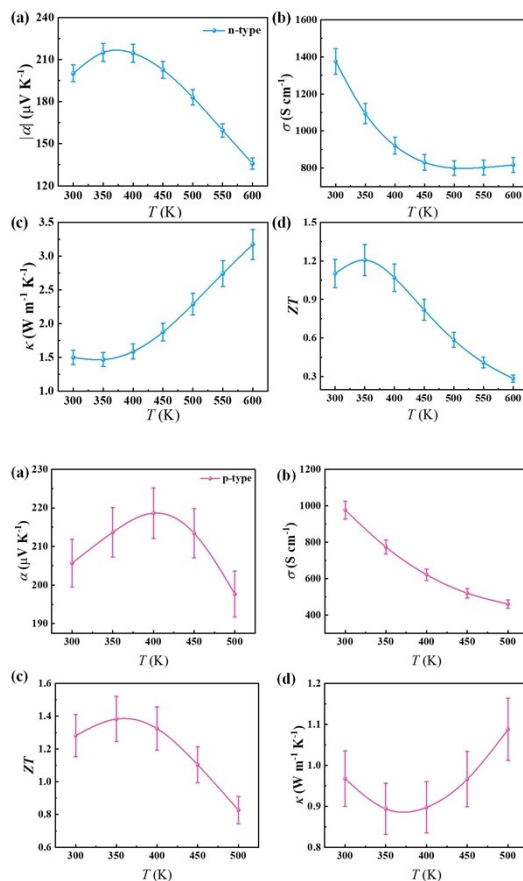

**Figure S7.** Temperature-dependent TE transport coefficients of n-type and p-type  $\text{Bi}_2\text{Te}_3$ -based materials: (a) Seebeck coefficient, (b) electrical conductivity, (c) thermal conductivity, and (d)  $ZT$  value

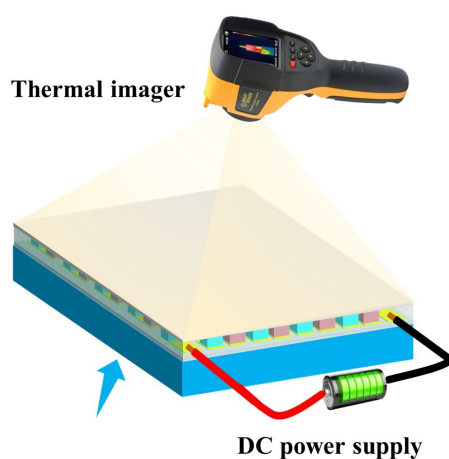

**Figure S8.** Schematic diagram of cooling performance measurement.

**Table S1**  $V_{oc}$  of a single pair of TE leg in literature under various  $\Delta T$ 

| $\Delta T$ (K) | Total voltage (mV) | pairs | reference |
|----------------|--------------------|-------|-----------|
| 50             | 37.2               | 52    | (3)       |
| 10             | 121                | 31    | (4)       |
| 20             | 600                | 200   | (5)       |
| 30             | 500                | 128   | (6)       |
| 30             | 246                | 60    | (7)       |
| 50             | 236                | 18    | (8)       |
| 40             | 2120               | 220   | (9)       |
| 20             | 3                  | 1     | (10)      |
| 10             | 59.96              |       |           |
| 30             | 130                | 32    | (11)      |
| 60             | 278.3              |       |           |
| 45             | 381                | 32    | (12)      |
| 52             | 1300               | 204   | (13)      |
| 20             | 88                 | 50    | (14)      |
| 10             | 93                 | 70    | (15)      |
| 15             | 101                |       |           |
| 20             | 129                |       |           |
| 30             | 253                | 49    | This work |
| 40             | 329                |       |           |
| 50             | 404                |       |           |

**Table S2** A comparison of our f-TED with recently typical f-TEDs in TE output performances.

| Materials                                                                  | Seebeck coefficient per unit area<br>( $\mu\text{V K}^{-1} \text{cm}^{-2}$ ) | Normalized power density<br>( $\mu\text{W cm}^{-2} \text{K}^{-2}$ ) | Ref. |
|----------------------------------------------------------------------------|------------------------------------------------------------------------------|---------------------------------------------------------------------|------|
| Ag-Ni/PDMS-Bi <sub>2</sub> Te <sub>3</sub>                                 | 3160                                                                         | 0.26                                                                | (16) |
| Ecoflex-Bi <sub>2</sub> Te <sub>3</sub> /Sb <sub>2</sub> Te <sub>3</sub>   | 1058                                                                         | 0.416                                                               | (17) |
| Polyimine-Bi <sub>2</sub> Te <sub>3</sub> /Sb <sub>2</sub> Te <sub>3</sub> | 1302                                                                         | 1.08                                                                | (5)  |
| Bi/Sb chalcogenides                                                        | 10526                                                                        | 0.0022                                                              | (18) |
| Yarn-Bi <sub>2</sub> Te <sub>3</sub> /Sb <sub>2</sub> Te <sub>3</sub>      | 4024                                                                         | 0.095                                                               | (19) |
| p/n type MWCNT film                                                        | 333                                                                          | 0.75                                                                | (20) |
| PEDOT:PSS film                                                             | 427                                                                          | 0.045                                                               | (21) |
| Sb <sub>2</sub> Te <sub>3</sub> /Te <sub>x</sub> film                      | 334                                                                          | 0.7                                                                 | (22) |
| LMEC-Bi <sub>2</sub> Te <sub>3</sub>                                       | 396                                                                          | 0.163                                                               | (23) |
| PI-p/n type CNT films                                                      | 3390                                                                         | 0.0931                                                              | (24) |
| p/n type CNT fiber                                                         | 125                                                                          | 0.0035                                                              | (25) |
| PI/BN- Bi <sub>2</sub> Te <sub>3</sub> /Sb <sub>2</sub> Te <sub>3</sub>    | 1340                                                                         | 1.54                                                                | (4)  |
| BiTe-based TE leg /LM electrodes                                           | 74.4                                                                         | 0.1                                                                 | (10) |
| BiTe-based TE film /Cu electrodes                                          | 600                                                                          | 1.52                                                                | (26) |
| BiTe-based TE leg /Cu electrodes                                           | 1250                                                                         | 7.648                                                               | (27) |
| BiTe-based TE leg /Cu electrodes                                           | 1000                                                                         | 0.576                                                               | (28) |



**Table S3** National standard of Air Velocity Rating issued by China Meteorological Newspaper

| Level | Air velocity(m s-1) | wind          |
|-------|---------------------|---------------|
| 0     | 0~0.2               | Ash breeze    |
| 1     | 0.3~1.5             | Soft breeze   |
| 2     | 1.6~3.3             | Light breeze  |
| 3     | 3.4~5.4             | Breeze        |
| 4     | 5.4~7.9             | Gentle breeze |
| 5     | 8.0~10.7            | Strong breeze |
| 6     | 10.8~13.8           | Strong wind   |
| 7     | 13.9~17.1           | Moderate gale |
| 8     | 17.2~20.7           | gale          |
| 9     | 20.8~24.4           | Strong gale   |
| 10    | 24.5~28.4           | Wild wind     |
| 11    | 28.5~32.6           | Storm wind    |
| 12    | 32.7~36.9           | hurricane     |
| 13    | >36.9               | ---           |

## Reference

- (1) Q. Zhang, M. Yuan, K. Pang, Y. Zhang, R. Wang, X. Tan, G. Wu, H. Hu, J. Wu, P. Sun, G. Liu and J. Jiang, *Adv. Mater.*, 2023, **35**, 2300338.
- (2) W. Huang, X. Tan, J. Cai, S. Zhuang, C. Zhou, J. Wu, G. Liu, B. Liang and J. Jiang, *Mater. Today Phys.*, 2023, **32**, 101022.
- (3) Y. Wang, Y. Shi, D. Mei and Z. Chen, *Appl. Energ.*, 2018, **215**, 690–698.
- (4) P. Zhu, X. Luo, X. Lin, Z. Qiu, R. Chen, X. Wang, Y. Wang, Y. Deng and Y. Mao, *Energ. Convers. Manage.*, 2023, **285**, 117017.
- (5) P. Zhu, C. Shi, Y. Wang, Y. Wang, Y. Yu, Y. Wang, Y. Deng and J. Xiao, *Adv. Energy Mater.*, 2021, **11**, 2100920.
- (6) Y. Xu, B. Wu, Y. Guo, C. Hou, Y. Li, H. Wang and Q. Zhang, *J. Alloys Compd*, 2023, **945**, 169260.
- (7) X. Liang, X. Zhang, B. Zhu, Y. Hou, M. Ke and Z. Wang, *ChemNanoMat*, 2023, **9**, e202300207.
- (8) H. You, Z. Li, Y. Shao, X. Yuan, W. Liu, H. Tang, Q. Zhang, Y. Yan and X. Tang, *Appl. Therm. Eng.*, 2022, **202**, 117818.
- (9) B. Lee, H. Cho, K. T. Park, J.-S. Kim, M. Park, H. Kim, Y. Hong and S. Chung, *Nat. Commun.*, 2020, **11**, 5948.
- (10) S. H. Jeong, F. J. Cruz, S. Chen, L. Gravier, J. Liu, Z. Wu, K. Hjort, S.-L. Zhang and Z.-B. Zhang, *ACS Appl. Mater. Interfaces*, 2017, **9**, 15791–15797.
- (11) M. Zadan, M. H. Malakooti and C. Majidi, *ACS Appl. Mater. Interfaces*, 2020, **12**, 17921–17928.
- (12) S. Lin, L. Zhang, W. Zeng, D. Shi, S. Liu, X. Ding, B. Yang, J. Liu, K. Lam, B. Huang and X. Tao, *Commun. Mater.*, 2022, **3**, 44.
- (13) N. Van Toan, T. T. Kim Tuoi and T. Ono, *J. Power Sources*, 2022, **536**, 231504.
- (14) D. Madan, Z. Wang, P. K. Wright and J. W. Evans, *Appl. Energ.*, 2015, **156**, 587–592.
- (15) K. Gürkan, H. Karaman and S. Ballikaya, *Energ. Convers. and Manage.*, 2023, **291**, 117335.
- (16) J. Kim, S. Khan, P. Wu, S. Park, H. Park, C. Yu and W. Kim, *Nano Energy*, 2021, **79**, 105419.
- (17) Y. Yang, H. Hu, Z. Chen, Z. Wang, L. Jiang, G. Lu, X. Li, R. Chen, J. Jin, H. Kang, H. Chen, S. Lin, S. Xiao, H. Zhao, R. Xiong, J. Shi, Q. Zhou, S. Xu and Y. Chen, *Nano Lett.*, 2020, **20**, 4445–4453.
- (18) W. Ren, Y. Sun, D. Zhao, A. Aili, S. Zhang, C. Shi, J. Zhang, H. Geng, J. Zhang, L. Zhang, J. Xiao and R. Yang, *Sci. Adv.*, 2021, **7**, eabe0586.
- (19) T. Lee, J. W. Lee, K. T. Park, J.-S. Kim, C. R. Park and H. Kim, *ACS Nano*, 2021, **15**, 13118–13128.
- (20) X. Sun, Y. Wang, K. Li, J. Wang, X. Dai, D. Chong, J. Yan and H. Wang, *Adv. Funct. Mater.*, 2022, **32**, 2203080.
- (21) Q. Zhou, K. Zhu, J. Li, Q. Li, B. Deng, P. Zhang, Q. Wang, C. Guo, W. Wang and W. Liu, *Adv. Sci.*, 2021, **8**, 2004947.
- (22) M. Wei, X. Shi, Z. Zheng, F. Li, W. Liu, L. Xiang, Y. Xie, Y. Chen, J. Duan, H. Ma, G. Liang, X. Zhang, P. Fan and Z. Chen, *Adv. Funct. Mater.*, 2022, **32**, 2207903.
- (23) Y. Han, L. Simonsen and M. H. Malakooti, *Adv. Energy Mater.*, 2022, **12**, 2201413.
- (24) B. Wu, Y. Guo, C. Hou, Q. Zhang, Y. Li and H. Wang, *Nano Energy*, 2021, **89**, 106487.
- (25) T. Sun, B. Zhou, Q. Zheng, L. Wang, W. Jiang and G. J. Snyder, *Nat. Commun.*, 2020, **11**, 572.
- (26) S. J. Kim, J. H. We and B. J. Cho, *Energy Environ. Sci.*, 2014, **7**, 1959.
- (27) S. J. Kim, H. E. Lee, H. Choi, Y. Kim, J. H. We, J. S. Shin, K. J. Lee and B. J. Cho, *ACS Nano*, 2016, **10**, 10851–10857.
- (28) S. Hong, Y. Gu, J. K. Seo, J. Wang, P. Liu, Y. S. Meng, S. Xu and R. Chen, *Sci. Adv.*, 2019, **5**, eaaw0536.

- (29) L. Yi, H. Xu, H. Yang, S. Huang, H. Yang, Y. Li, Q. Zhang, Z. Guo, H. Hu, P. Sun, X. Tan, G. Liu, K. Song and J. Jiang, *J. Power Sources*, 2023, **559**, 232661.
